# Supplementary material for: Direct measurements of the saturated vapor pressure of water confined in extended nanospaces using capillary evaporation phenomena
Source: Royal Society of Chemistry journal article supplement (doi:10.1039/c2ra01330d), 2012-01-01
Supplement: c2ra01330d.pdf [file c2ra01330d.pdf]

## Supporting Information

# Direct Measurements of the Saturated Vapor Pressure of Water Confined in Extended Nanospaces using Capillary Evaporation Phenomena

*Takehiko Tsukahara<sup>1</sup>, Taku Maeda<sup>2</sup>, Kazuma Mawatari<sup>2</sup>,*

*Akihide Hibara<sup>2</sup>, and Takehiko Kitamori<sup>2#</sup>*

<sup>1</sup> *Research Laboratory for Nuclear Reactors, Tokyo Institute of Technology, 2-12-1-N1-32, O-Okayama,  
Meguro-ku, Tokyo 152-8550 Japan,*

<sup>2</sup> *Department of Applied Chemistry, School of Engineering, The University of Tokyo, 7-3-1, Hongo,  
Bunkyo-ku, Tokyo 113-8656, Japan*

# CORRESPONDING AUTHOR; Prof. Takehiko Kitamori

Tel: +81-3-5841-7231, Fax: +81-3-5841-6039

E-mail: [kitamori@icl.t.u-tokyo.ac.jp](mailto:kitamori@icl.t.u-tokyo.ac.jp)

**Table S1** The fabricated sizes and its capillary radius of the extended nanospaces.

| Width / nm | Depth / nm | Capillary radius<br>$r$ / nm |
|------------|------------|------------------------------|
| 120        | 90         | 103                          |
| 420        | 190        | 262                          |
| 840        | 370        | 514                          |

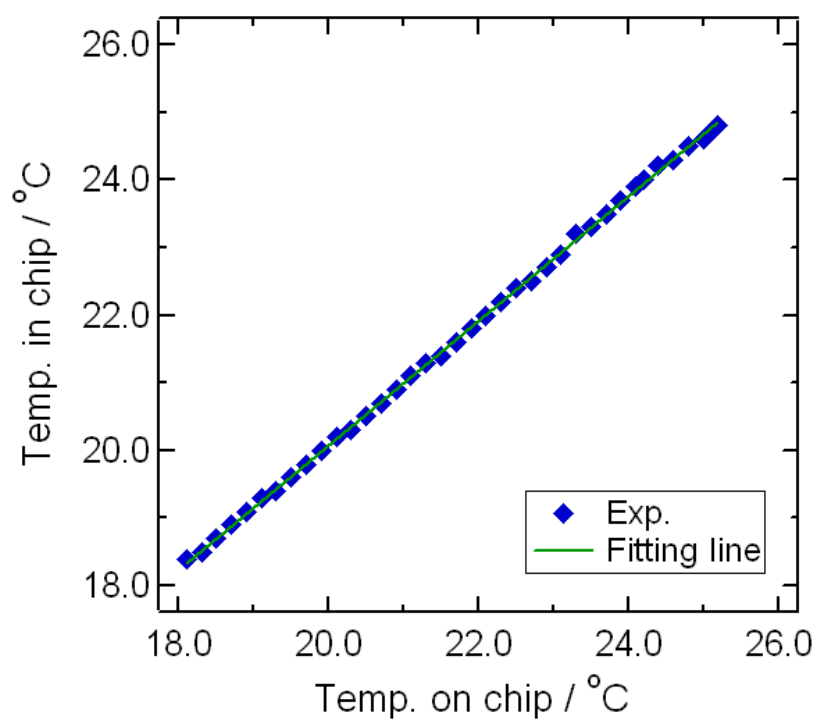

**Figure S1** Plots of the experimental in chip temperatures vs. on chip temperatures, and their fitted line.

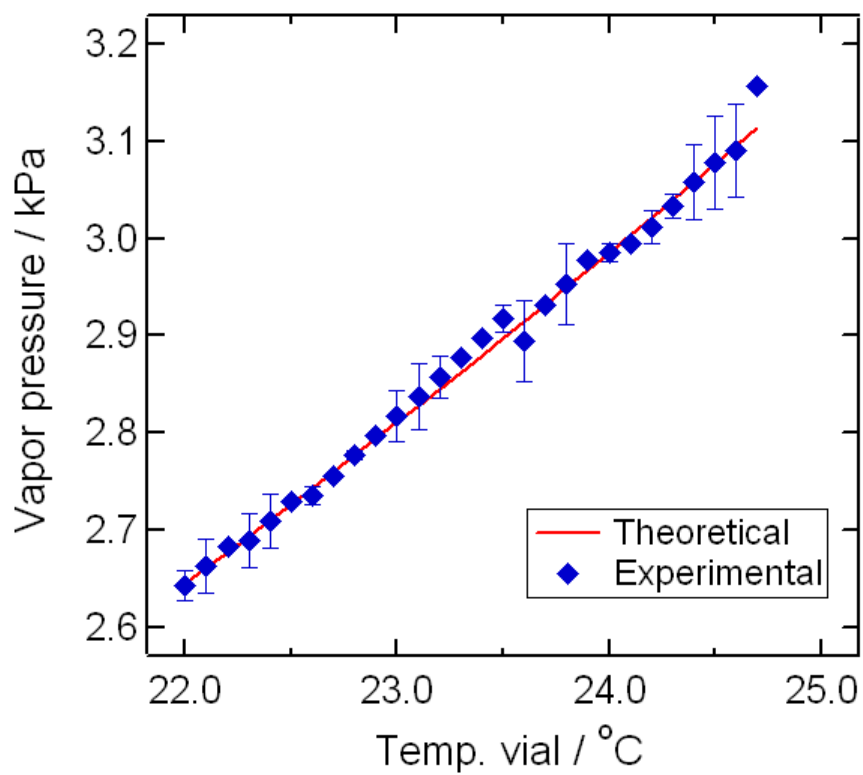

**Figure S2** Plots of the experimental and theoretical vapor pressure values against temperatures. The theoretical values were calculated using Wagner's equation (see Ref. 18.). Error bars represent  $2\sigma$  uncertainties.
